# Supplementary material for: Owner concerns that pets have Covid-19
Source: PubMed Central journal article supplement — Vet Rec. 2020 Jun 11;186(18):608–9. doi: 10.1136/vr.m2249 (PMC7365567; doi:10.1136/vr.m2249), 2020-06-11
Supplement: vetrecm2249supp001.pdf [file vetrecm2249supp001.pdf]

# APPENDIX

## Table of Contents

|                            |   |
|----------------------------|---|
| List of Investigators..... | 2 |
| Survey Questions.....      | 3 |

## **LIST OF INVESTIGATORS**

Katharine M. Watson, MA, BVMS  
Department of Epidemiology and Biostatistics  
Indiana University School of Public Health  
1025 E. 7<sup>th</sup> Street, Room 070B  
Bloomington, IN 47405  
Email: kamiwats@iu.edu  
USA

Yijia Zhang, MS, MPH  
Department of Epidemiology and Biostatistics  
Indiana University School of Public Health  
Bloomington, IN 47405  
USA

Kristine Towns, DVM  
Frankfort Animal Hospital  
Frankfort, IN 46041  
USA

Ka He, MD, ScD  
Department of Obstetrics and Gynecology and Department of Epidemiology  
Columbia University Irving Medical Center  
New York, NY 10032  
USA

## Survey Questions:

---

### Start of Block: Default Question Block

Q1 Have you had clients express concern that their pets might be infected with SARS-CoV-2 (the virus that causes COVID-19)?

- No (1)
- Yes (2)

---

*Display This Question:*

*If Have you had clients express concern that their pets might be infected with SARS-CoV-2 (the virus... = Yes*

Q8 How often did you experience a client who was concerned their pet had COVID-19?

- Less than once a week
- Once a week
- More than once a week

---

*Display This Question:*

*If How often did you experience a client who was concerned their pet had COVID-19? = More than once a week*

Q9 Approximately how many times, per week, was a client concerned their pet had COVID-19?

\_\_\_\_\_ (numeric answer)\_

---

*Display This Question:*

*If Have you had clients express concern that their pets might be infected with SARS-CoV-2 (the virus... = Yes*

Q10 Did the concerned owner(s) express that the pet had been in close contact with someone suspected of having COVID-19?

- No
  - Yes; they were in contact with someone who had tested positive.
  - Yes; they were in contact with a suspected infected person who did not test positive.
- 

Q2 If you have had owners worried that their pets may have COVID-19, were the pets:

- Dogs
  - Cats
  - Dogs and Cats
  - Other
- 

Q3 Have you tried to obtain testing for possible COVID-19 cases in pets?

- No. I have not seen cases that I thought were likely to be COVID-19.
  - No. I thought a case might have been COVID-19, but a test was not appropriate at that time.
  - Yes, and I obtained a test.
  - Yes, but I could not obtain a test.
  - Other
-

*Display This Question:*

*If Have you tried to obtain testing for possible COVID-19 cases in pets? != No. I thought a case might have been COVID-19, but a test was not appropriate at that time.*

*Or Have you tried to obtain testing for possible COVID-19 cases in pets? != No. I have not seen cases that I thought were likely to be COVID-19.*

Q4 If you tried to obtain SARS CoV-2 testing but could not, was the barrier:

- Cost of the test
  - Obtaining a test
  - Difficulty performing the test
  - Other
- 

Q5 Are you a:

- Veterinarian
  - Veterinary technician
  - Other
- 

Q8 In what type of veterinary practice do you, primarily, work?

- General practice
  - Specialty (e.g. internal medicine, oncology, etc.)
  - Emergency/Critical Care
  - Other
-

Q7 In what U.S. state or district is your practice located?

▼ Alabama (4023) ... Wyoming (4073)

End of Block: Default Question Block
